# Supplementary material for: Chromobox homolog 8 (CBX8) Interacts with Y-Box binding protein 1 (YBX1) to promote cellular proliferation in hepatocellular carcinoma cells
Source: publisher site journal article supplement (doi:10.18632/aging.102241), 2019-09-08
Supplement: Supplementary file [file aging-v11i17-102241-supplementary-material-SD2.pdf]

**SUPPLEMENTARY FIGURES**

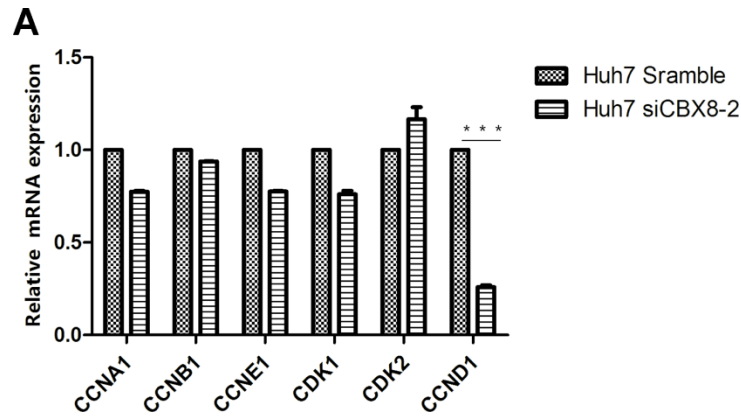

**Supplementary Figure 1. CBX8 positively correlates with the cell cycle signaling pathway.** (A) Cell cycle-related gene mRNA levels in CBX8-knockdown Huh7 cells, as detected by q-RT-PCR.

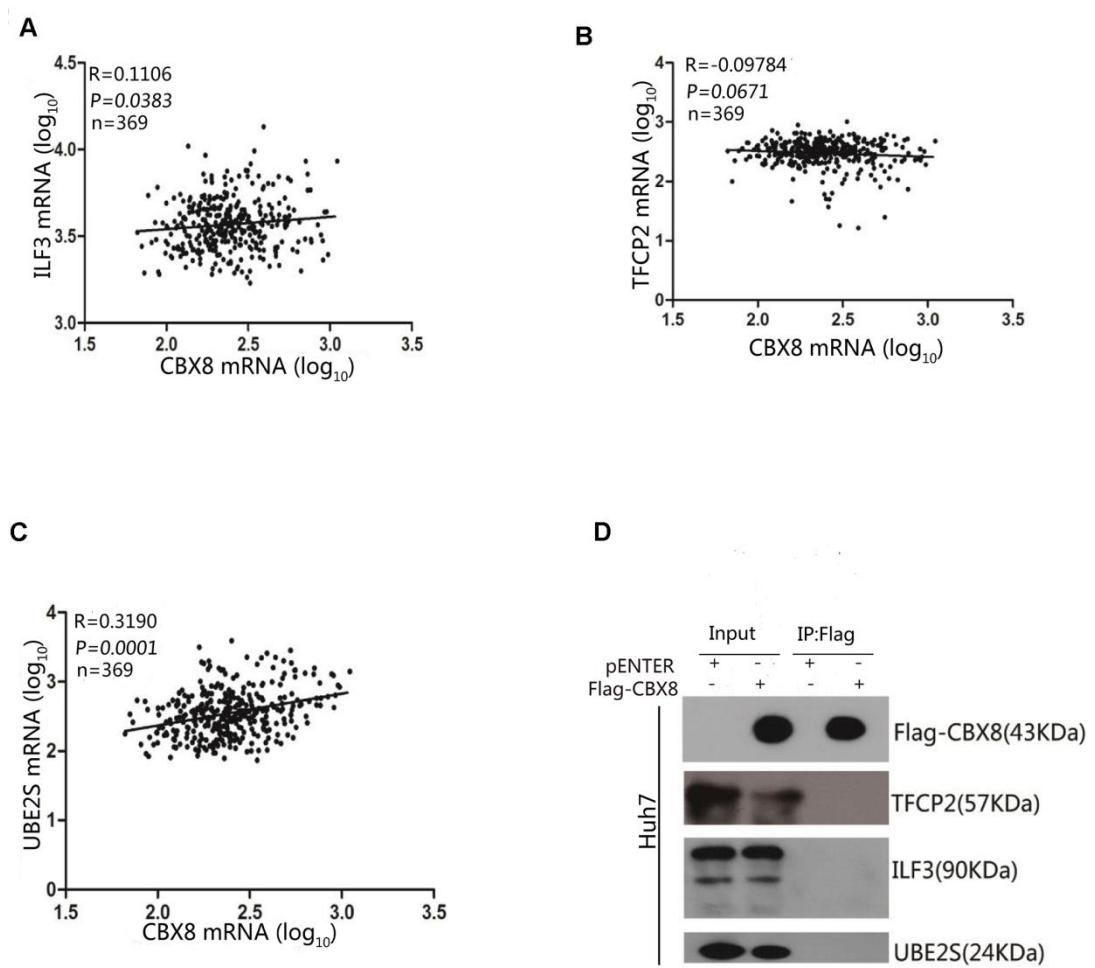

**Supplementary Figure 2. CBX8 interact with YBX1.** (A–C) Correlation between CBX8 mRNA and ILF3, TFPC2 and UBE2S mRNA in TCGA cohort. (D) Huh7 Cells were transfected with Flag-CBX8 overexpression vector for 48 h. An IP assay, using anti-Flag antibody, was used to detect the binding of CBX8 and ILF3, TFPC2, UBE2S.

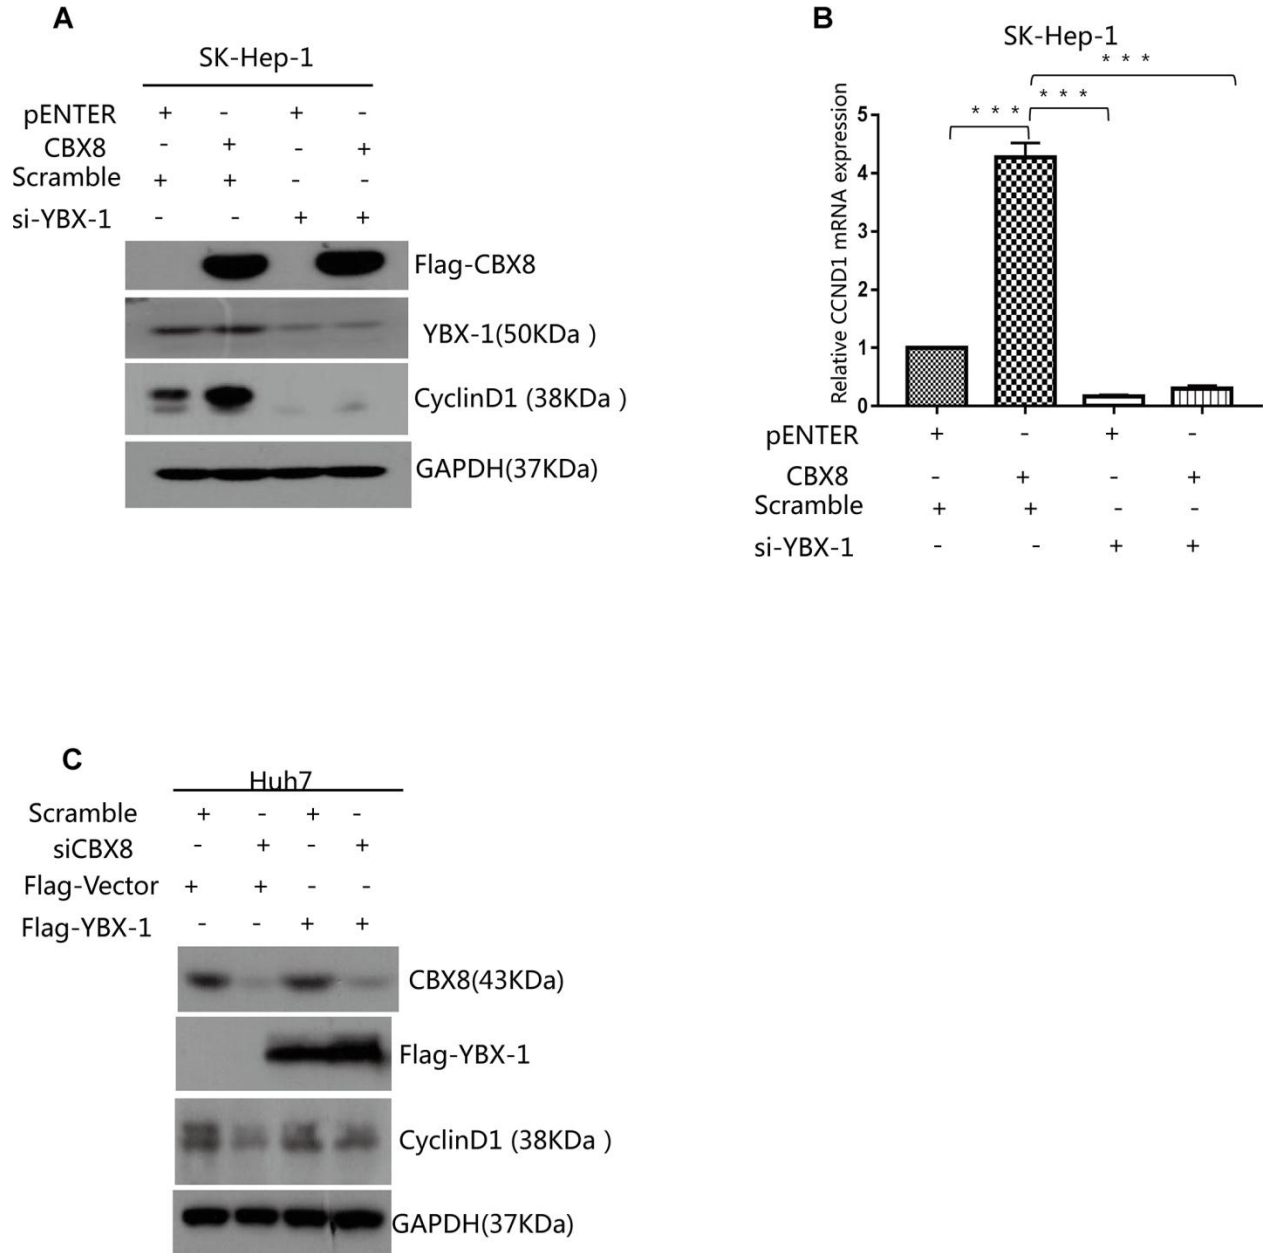

**Supplementary Figure 3. CBX8 increase levels of CyclinD1 through YBX1.** (A–B) Both protein and mRNA levels of CyclinD1 in CBX8-overexpressing or YBX1-knock-down SK-Hep1 cells, as detected by western blotting and q-RT-PCR. (C) Protein levels of CyclinD1 in CBX8-knock-down or YBX1-overexpressing Huh7 cells as detected by western blotting.

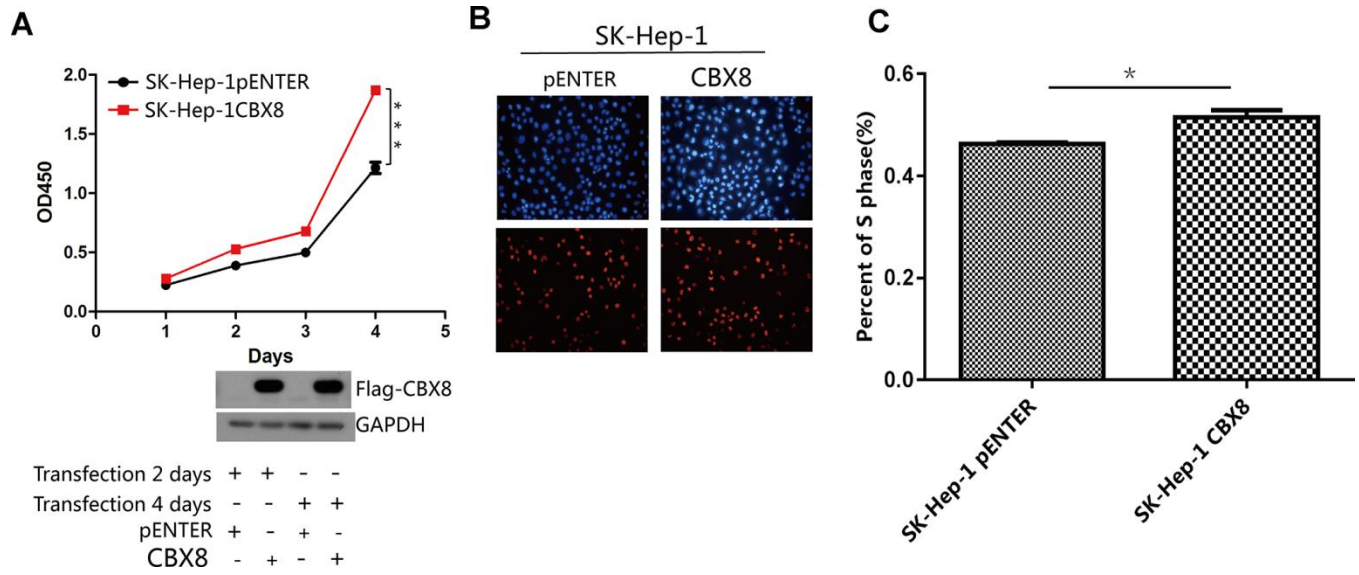

**Supplementary Figure 4. CBX8 overexpression promotes cell proliferation.** (A) Cell proliferation was evaluated by the CCK-8 assay. (B-C) Effect of CBX8 on cell proliferation, as measured by EDU assays \* $P < 0.05$ ; \*\* $P < 0.01$ ; \*\*\* $P < 0.001$ .

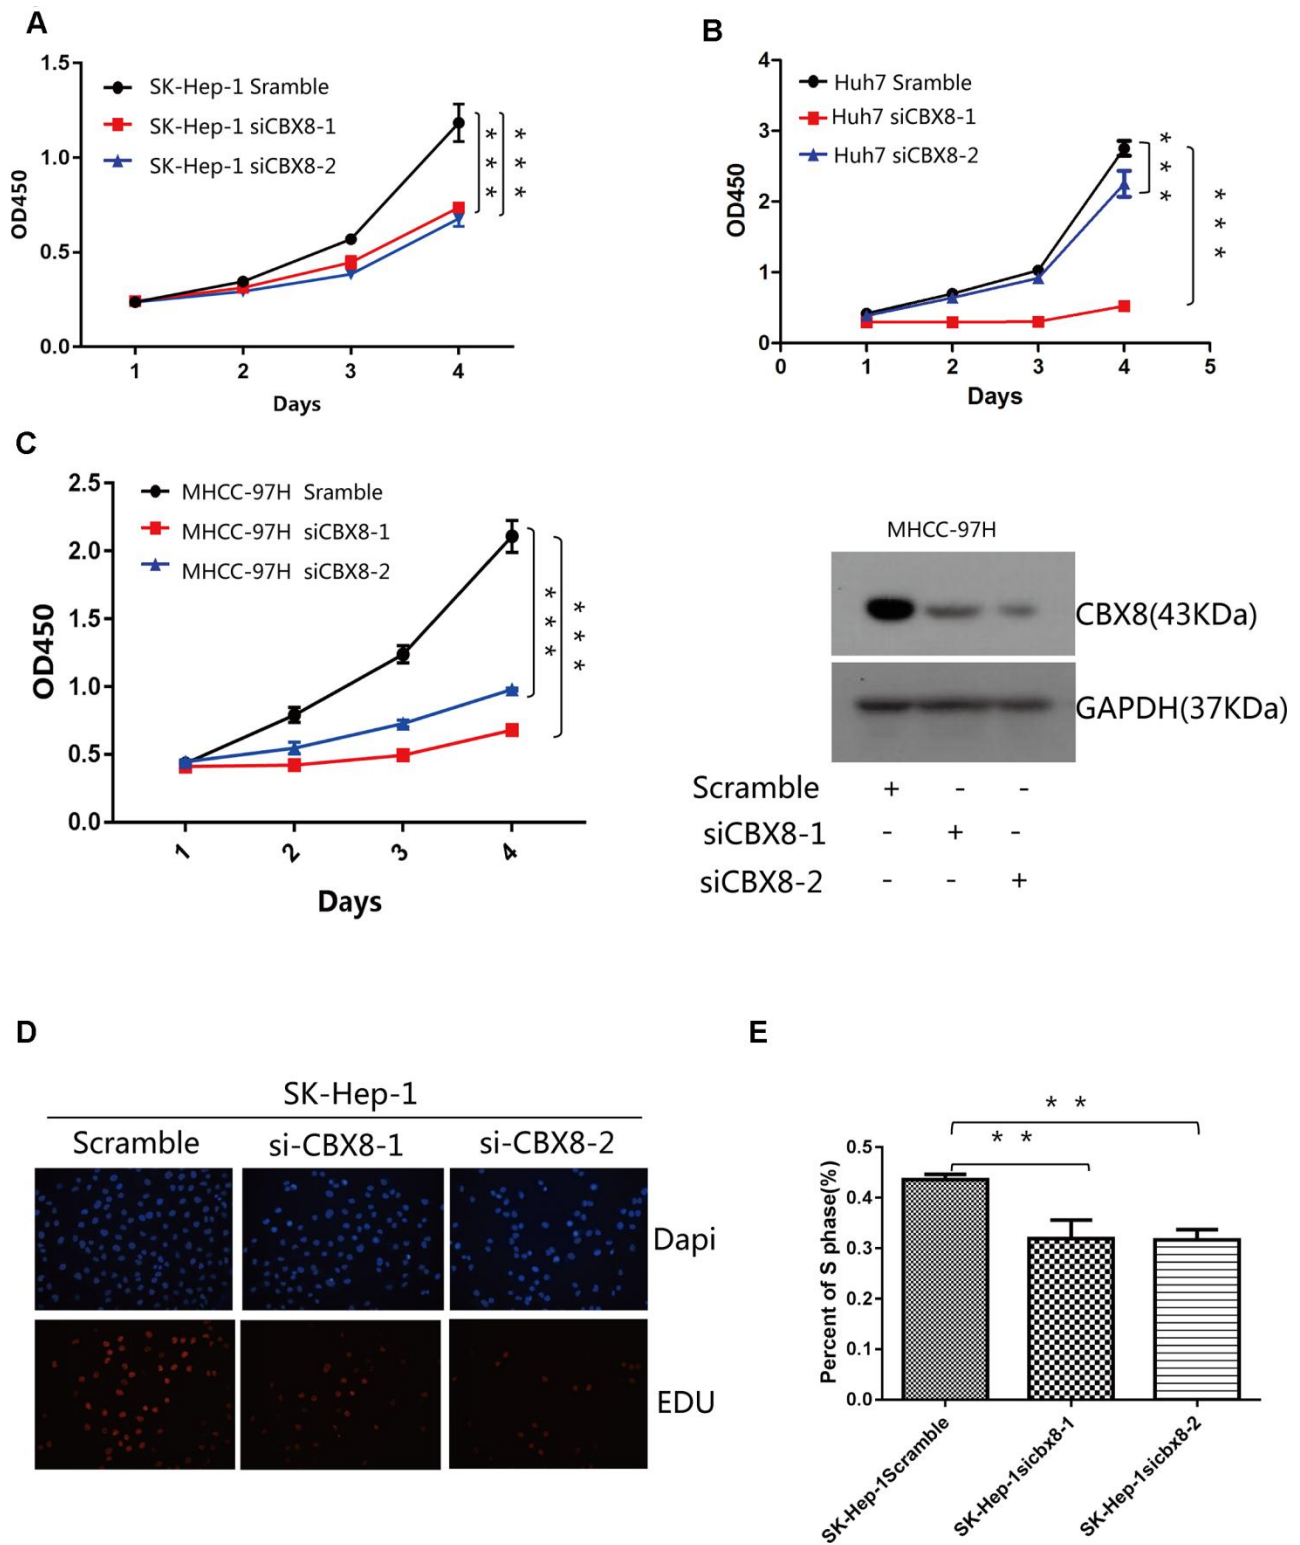

**Supplementary Figure 5. Knockdown of CBX8 dramatically decreases cell proliferation in vitro.** (A–C) Cell proliferation was evaluated by the CCK-8 assay. (D–E) Effect of CBX8 on cell proliferation, as measured by EdU assays \* $P < 0.05$ ; \*\* $P < 0.01$ ; \*\*\* $P < 0.001$ .

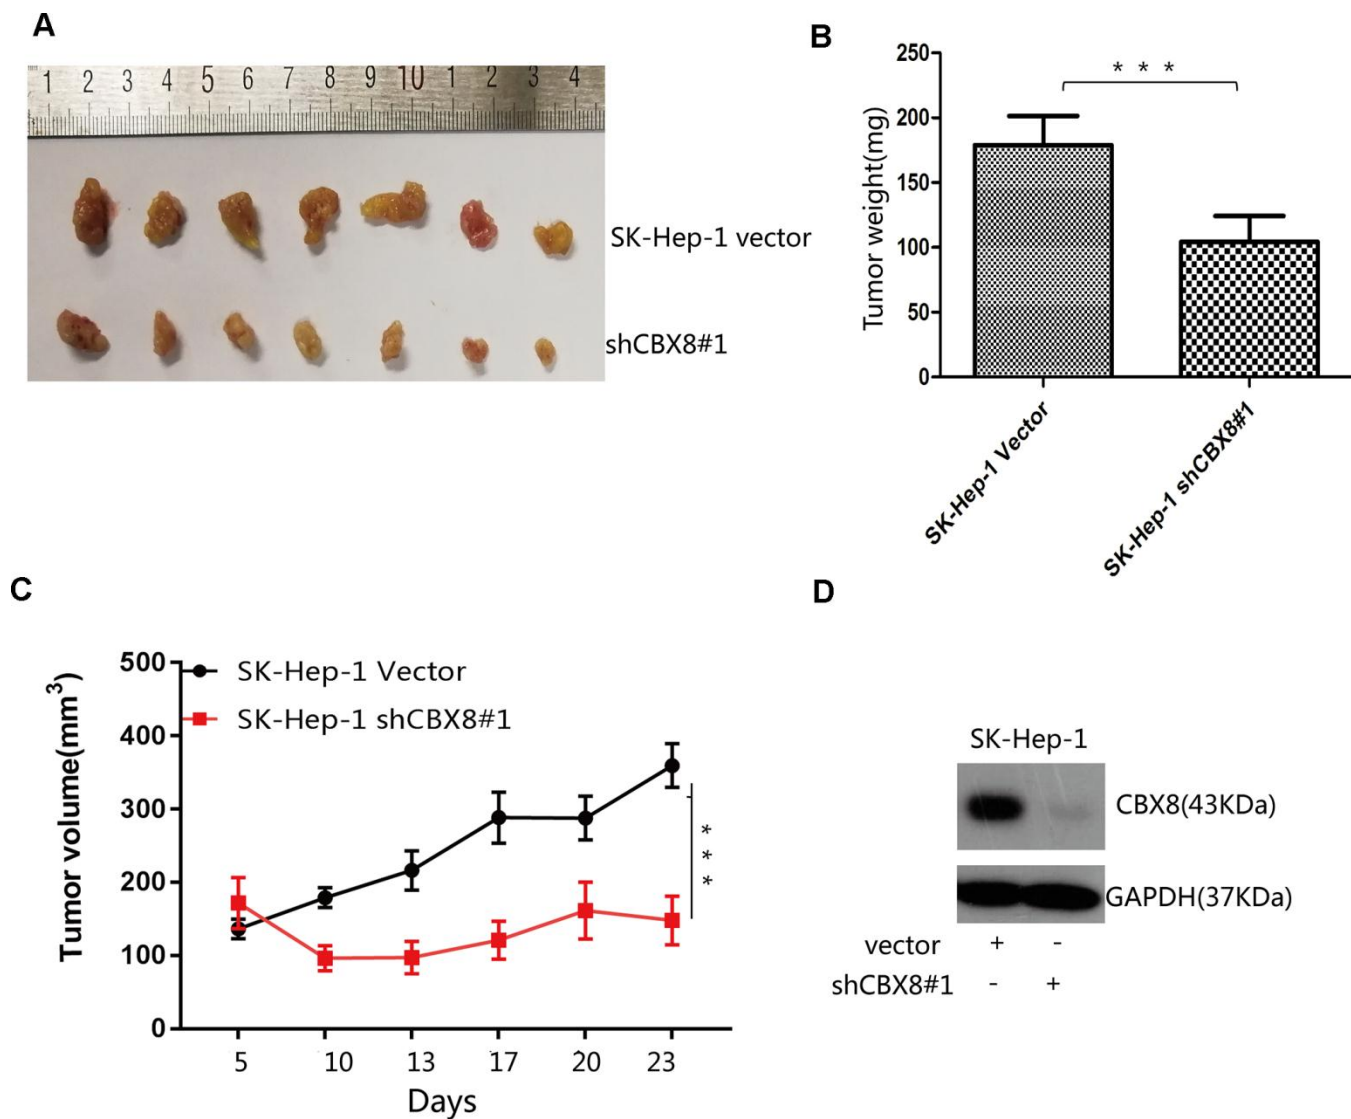

**Supplementary Figure 6.** Knockdown of CBX8 dramatically decreases cell proliferation in vivo (A) Representative images of tumors formed in nude mice injected subcutaneously with CBX8-silenced SK-Hep-1 cells. (B) Tumor weights (\*\**P* < 0.001). (C) Tumors induced by CBX8 silencing in SK-Hep-1 cells (\*\**P* < 0.001) showed markedly lower growth rates than control cells.

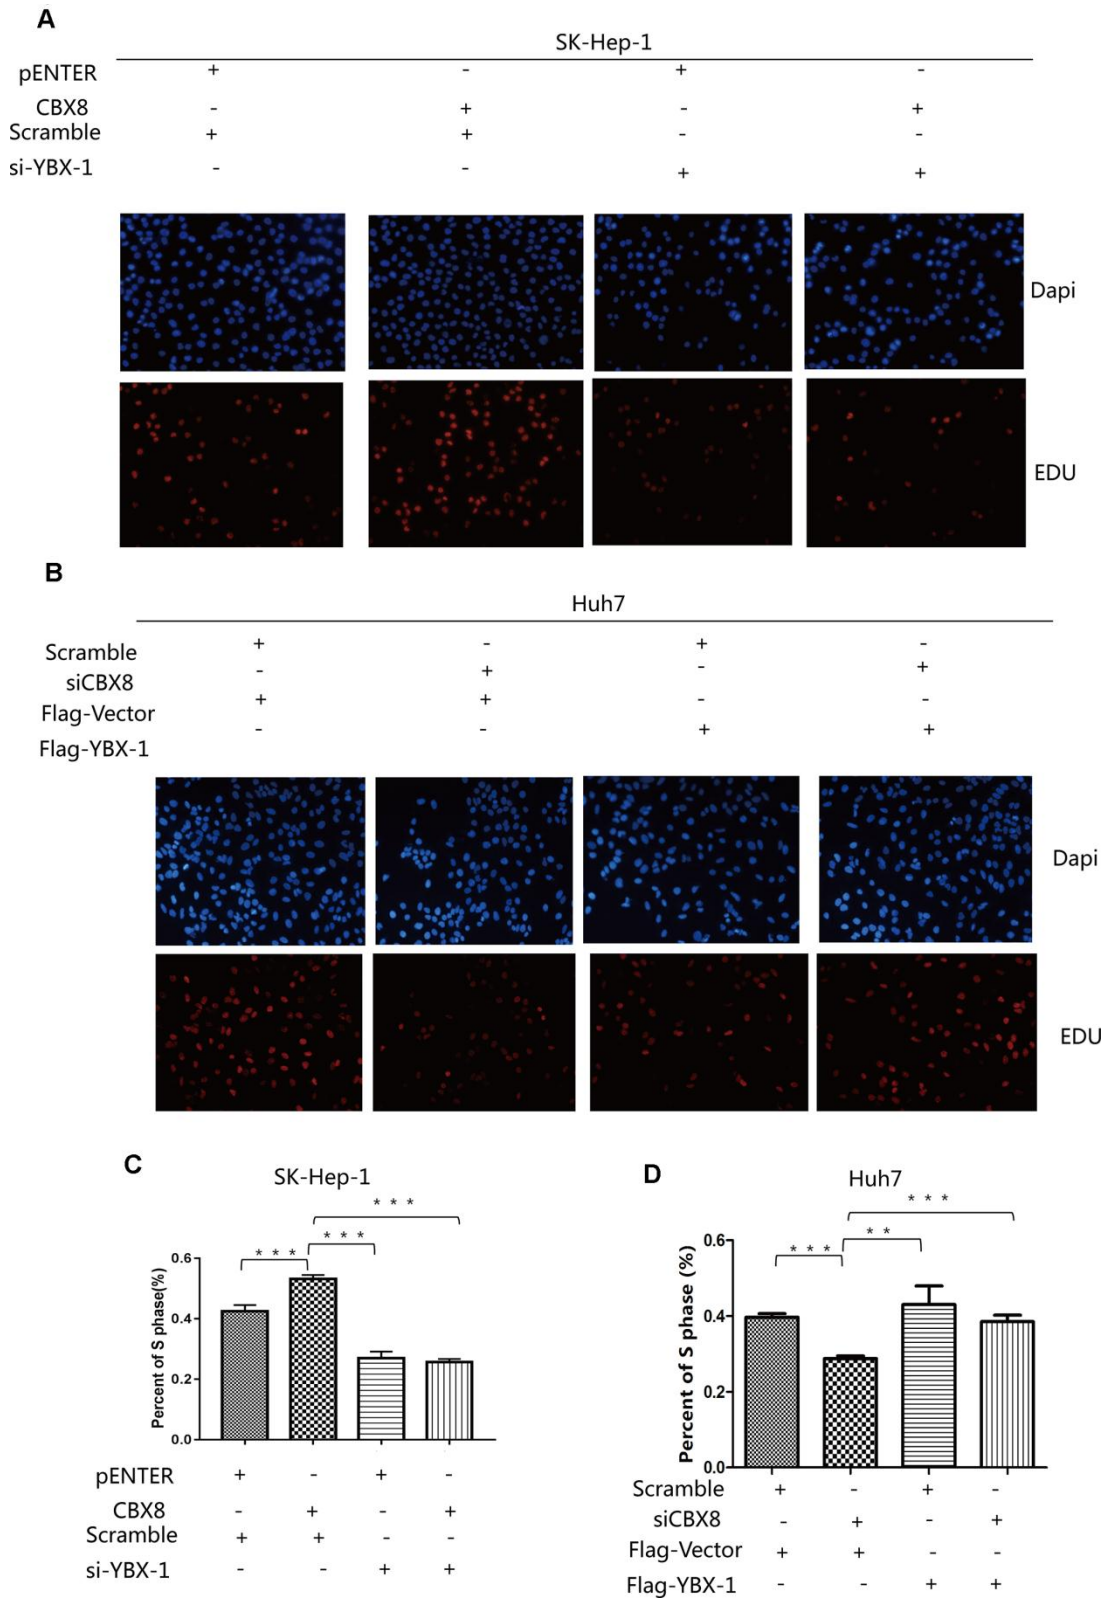

**Supplementary Figure 7. CBX8 promotes HCC cell proliferation through YBX1. (A–D)** Cell proliferation, as detected by EdU assays  
 $**P < 0.01$ ;  $***P < 0.001$ .

A

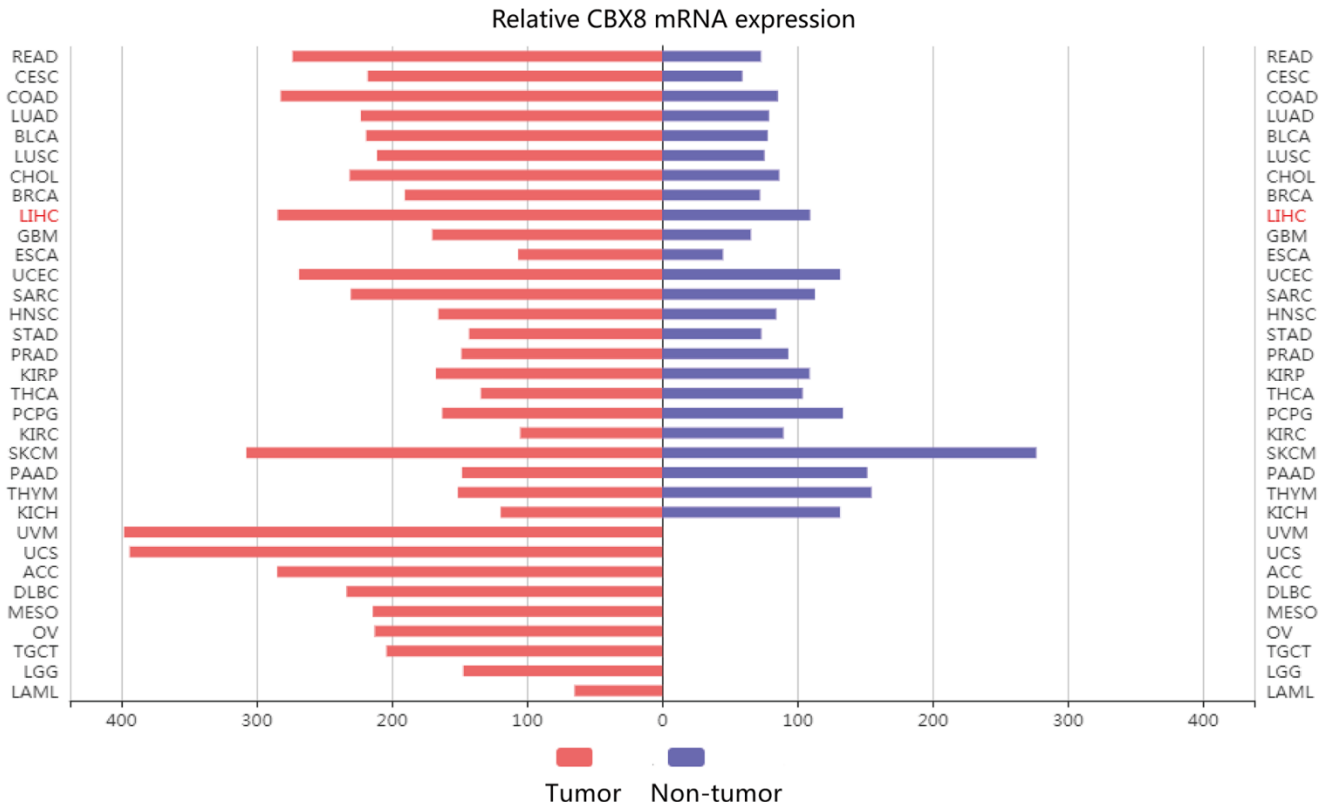

**Supplementary Figure 8.** CBX8 expression in human cancers (A) Relative CBX8 mRNA expression determined by RNA sequencing in human cancers from TCGA data (<http://cancergenome.nih.gov/>) using the GCBI website (<https://www.gcbi.com.cn>).

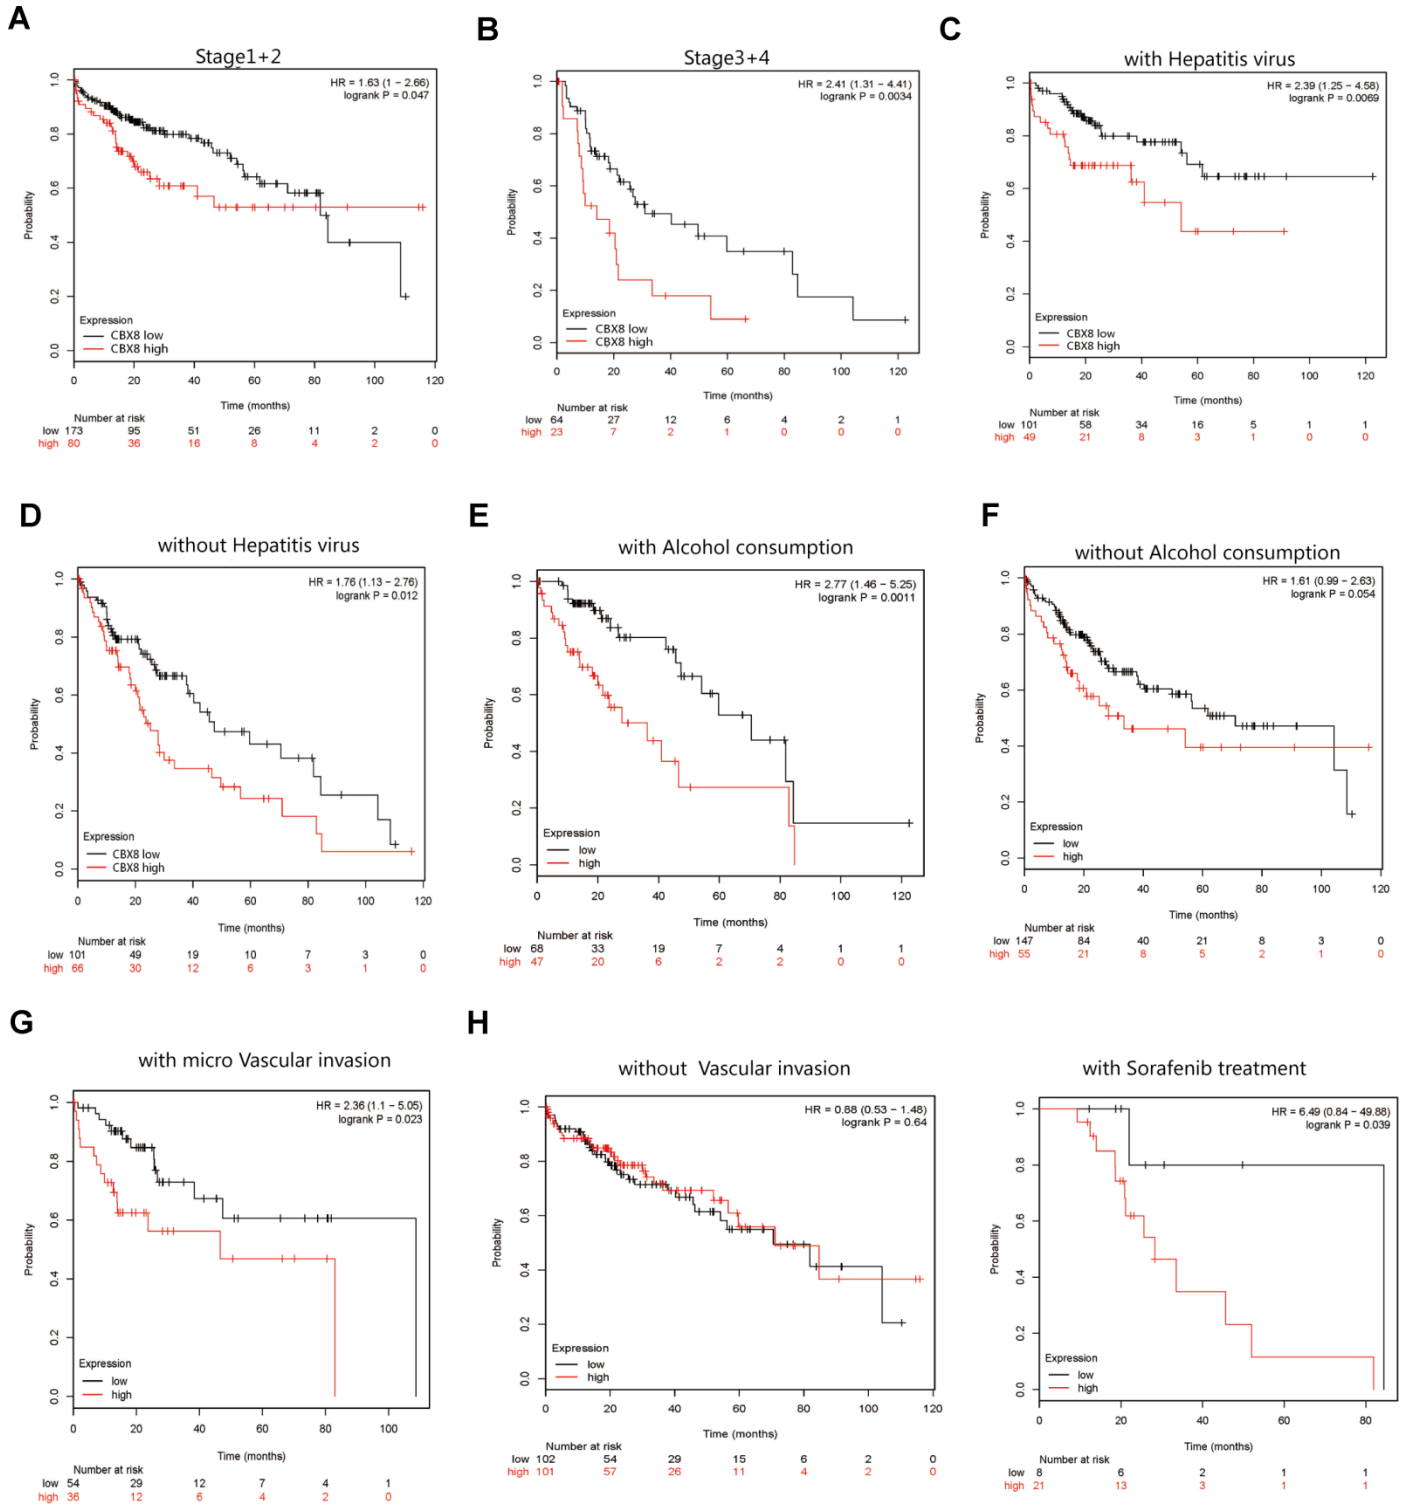

**Supplementary Figure 9. The prognostic value of CBX8 in HCC.** (A–I) Stratified analysis showed the correlation of CBX8 expression and overall survival in indicated groups in HCC from TCGA data using the Kaplan Meier-plotter website (<http://kmplot.com/analysis/>).



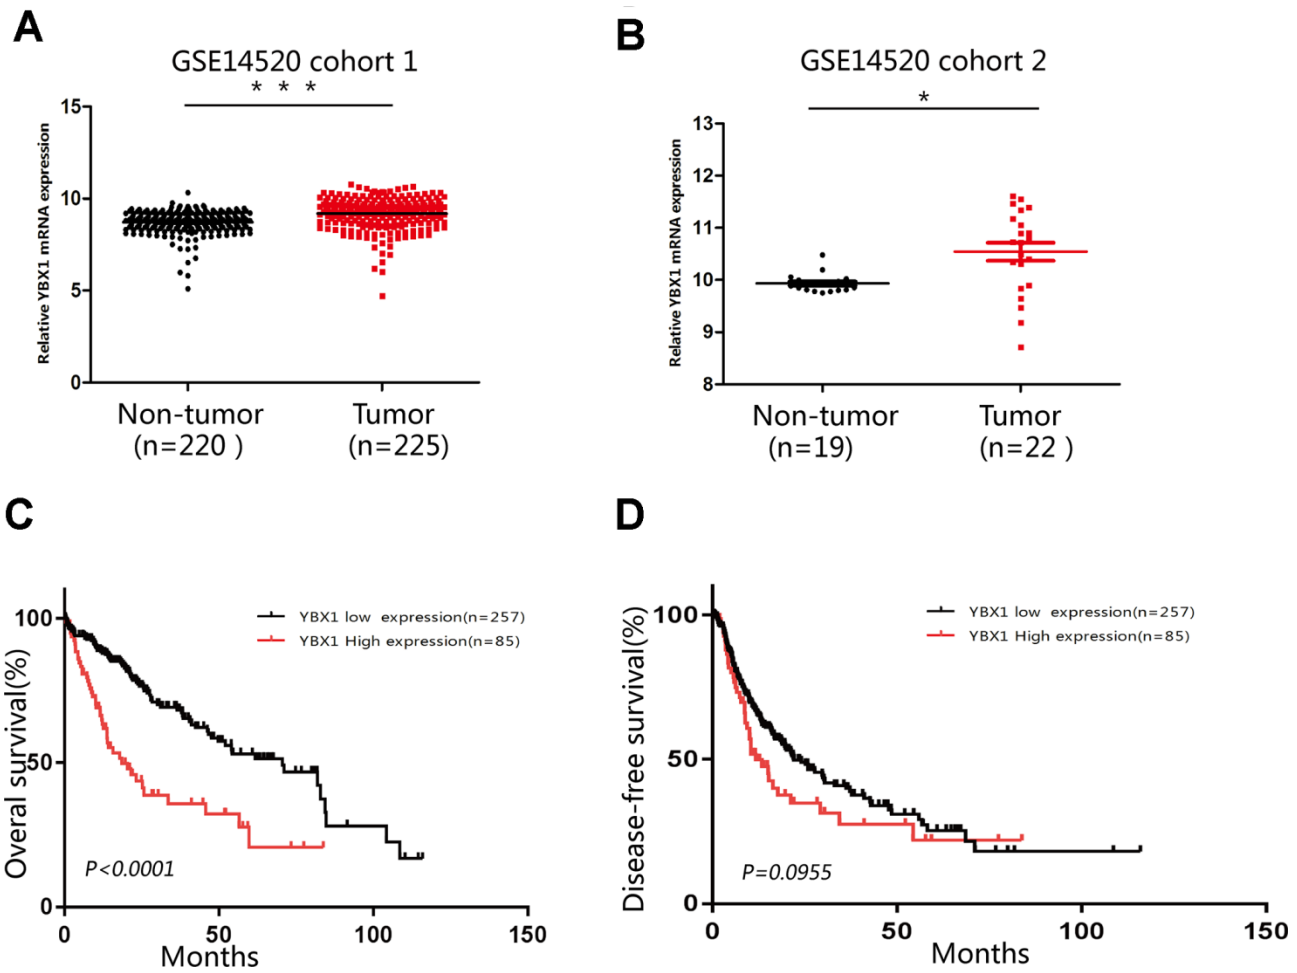

**Supplementary Figure 10. YBX1 expression is up-regulated in HCC and is correlated with prognosis.** (A–B) Expression of YBX1 in the GSE14520 cohort1 ( $P < 0.001$ ) and GSE14520 cohort2 ( $P < 0.05$ ). (C, D) Kaplan-Meier analysis of the overall and disease-free survival in the TCGA cohort based on YBX1 expression.

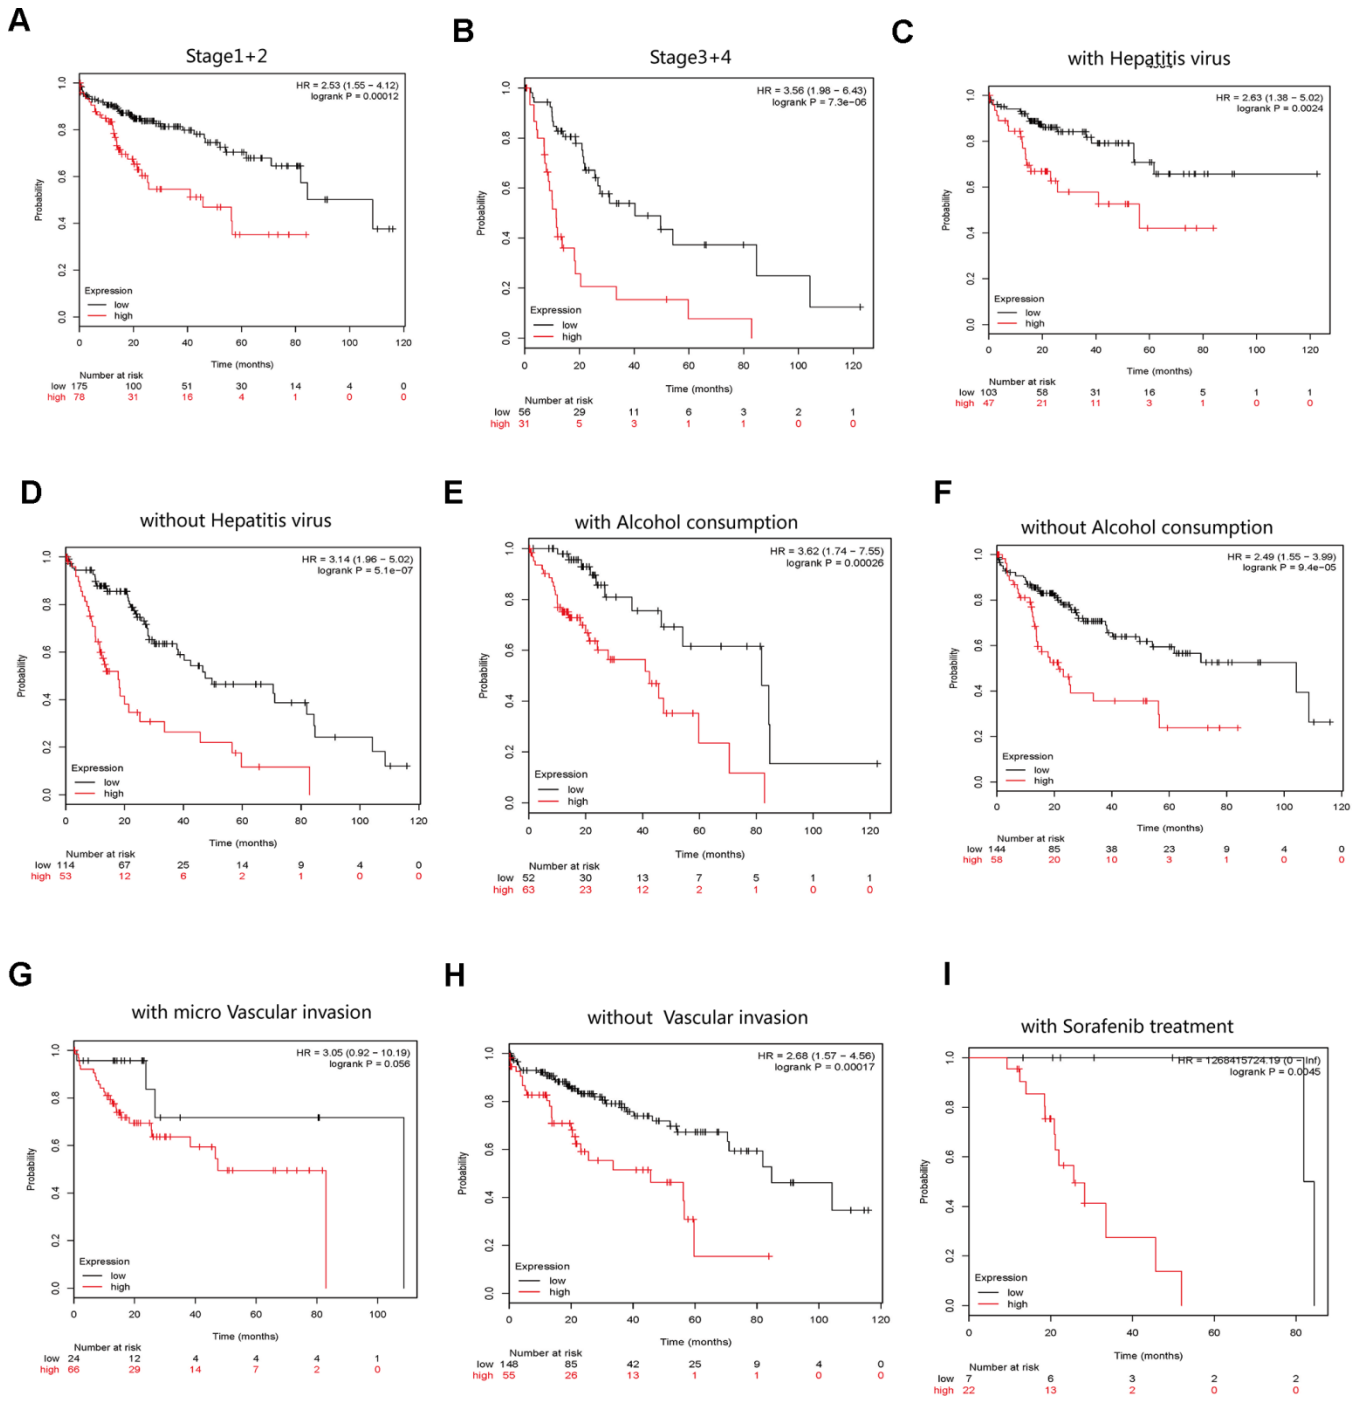

**Supplementary Figure 11. The prognostic value of YBX1 in HCC. (A-I)** Stratified analysis showed the correlation of YBX1 expression and overall survival in indicated groups in HCC from TCGA data using the Kaplan Meier-plotter website (<http://kmplot.com/analysis/>).
