# Supplementary material for: Chromobox homolog 8 (CBX8) Interacts with Y-Box binding protein 1 (YBX1) to promote cellular proliferation in hepatocellular carcinoma cells
Source: publisher site journal article supplement (doi:10.18632/aging.102241), 2019-09-08
Supplement: Supplementary file [file aging-v11i17-102241-supplementary-material-SD3.pdf]

## SUPPLEMENTARY TABLES

**Supplementary Table 1. Information on antibodies used in this study.**

| <b>Antibody</b>       | <b>WB</b> | <b>specificity</b> | <b>Company</b>               |
|-----------------------|-----------|--------------------|------------------------------|
| CBX8 (ab70796)        | 1:1000    | Rabbit Polyclonal  | Abcam                        |
| YBX1 (20339-1-AP)     | 1:500     | Rabbit Polyclonal  | Proteintech                  |
| Flag (F1804)          | 1:200     | Mouse monoclonal   | Sigma                        |
| CyclinD1 (SC8396)     | 1:200     | Mouse monoclonal   | Santa Cruz Biotechnology     |
| UBE2S (14115-1-AP)    | 1:500     | Rabbit Polyclonal  | Proteintech                  |
| ILF3 (sc-136197)      | 1:200     | Mouse monoclonal   | Santa Cruz Biotechnology     |
| TFCP2 (A5555)         | 1:500     | Rabbit Polyclonal  | ABclonal                     |
| $\beta$ -actin(AC026) | 1:7500    | Mouse monoclonal   | ABclonal                     |
| GAPDH (RM2002)        | 1:7500    | Mouse monoclonal   | Beijing Ray Antibody Biotech |

**Supplementary Table 2. Primer sequence used in this study.**

| <b>Gene</b>      | <b>sequence</b>                |
|------------------|--------------------------------|
| CBX8-F           | 5'ACGGAAAGGACGCATGGAAT 3'      |
| CBX8-R           | 5' CTTGGGTCCACGCTTTTTGG 3'     |
| CCND1-F          | 5'ATGCCAACCTCCTCAACGAC 3'      |
| CCND1-R          | 5'TCTGTTCCTCGCAGACCTCC3'       |
| $\beta$ -actin-F | 5'ACAGAGCCTCGCCTTTGCC 3'       |
| $\beta$ -actin-R | 5' GATATCATCATCCATGGTGAGCTGG3' |
| CCNA1-F          | 5' GAGAACGGGTCACGGAAACA3'      |
| CCNA1-R          | 5'ACTGTAGCCAGCACAACCTCC3'      |
| CCNB1-F          | 5'GAAACGCATTCTCTGCGACC3'       |
| CCNB1-R          | 5' ACACCCAGCAGAAACCAACA3'      |
| CCNE1-F          | 5'GCAGGATCCAGATGAAGAAATG3'     |
| CCNE1-R          | 5'TAATCCGAGGCTTGCACGTT3'       |
| CDK2-F           | 5'CCGAGCTCCTGAAATCCTCC3'       |
| CDK2-R           | 5'CCCAGAGTCCGAAAGATCCG3'       |
| CDK1-F           | 5'TTTCTTTCGCGCTCTAGCCA3'       |
| CDK1-R           | 5'CAATCGGGTAGCCCGTAGAC3'       |
